# Supplementary material for: A Possible Unaccounted Source of Nitrogen-Containing Compounds Formation in Aerosols: Amines Reacting with Secondary Ozonides
Source: Copernicus journal article supplement (doi:10.5194/egusphere-2023-2080), 2023-09-20
Supplement: Supplementary file 1 [file egusphere-2023-2080-supplement.pdf]

*Supplement of*

## **A Possible Unaccounted Source of Nitrogen-Containing Compounds Formation in Aerosols: Amines Reacting with Secondary Ozonides**

Junting Qiu<sup>1,2,3</sup>, Xinlin Shen<sup>1,2</sup>, Jiangyao Chen<sup>1,2</sup>, Guiying Li<sup>1,2</sup>, Taicheng An<sup>1,2</sup>

<sup>1</sup>Guangdong-Hong Kong-Macao Joint Laboratory for Contaminants Exposure and Health, Guangdong Key Laboratory of Environmental Catalysis and Health Risk Control, Institute of Environmental Health and Pollution control, Guangdong University of Technology, Guangzhou 510006, China.

<sup>2</sup>Guangzhou Key Laboratory of Environmental Catalysis and Pollution Control, Key Laboratory of City Cluster Environmental Safety and Green Development of the Ministry of Education, School of Environmental Science and Engineering, Guangdong University of Technology, Guangzhou 510006, China.

<sup>3</sup>Graduate School of Frontier Sciences, The University of Tokyo, 5-1-5 Kashiwanoha, Kashiwa 277-8563, Japan.

*Correspondence to:* Taicheng An (antc99@gdut.edu.cn)

The copyright of individual parts of the supplement might differ from the article license.

Number of Pages: 10

Number of Schemes: 2

Number of Figures: 5

## Content

|                                                                                                                                                                                                                                    |           |
|------------------------------------------------------------------------------------------------------------------------------------------------------------------------------------------------------------------------------------|-----------|
| <b>Schemes</b> .....                                                                                                                                                                                                               | <b>S4</b> |
| Scheme S1 (A) H-atom and D-atom exchange between P1 and D <sub>2</sub> O in AN/D <sub>2</sub> O solution. (B)<br>O-atom exchange between P1 and H <sub>2</sub> <sup>18</sup> O in AN/H <sub>2</sub> <sup>18</sup> O solution. .... | S4        |
| Scheme S2 Possible structures of P2 and P4 generated from the reactions of β-C SOZ and<br>α-H SOZ with MA.....                                                                                                                     | S5        |
| <b>Figures</b> .....                                                                                                                                                                                                               | <b>S6</b> |
| Figure S1 Chemical structures of β-caryophyllene and α-humulene.....                                                                                                                                                               | S6        |
| Figure S2 Schematic setup and procedure used in this work.....                                                                                                                                                                     | S7        |
| Figure S3 High-resolution positive-ion ESI mass spectra of the degradation products<br>extracted in AN/D <sub>2</sub> O (vol/vol = 4/1) from β-C reacting with O <sub>3</sub> . ....                                               | S8        |
| Figure S4 Positive-ion ESI mass spectra of the products extracted in AN/W (vol/vol = 4/1)<br>from ozonolysis of β-C in addition of EA at different timings .....                                                                   | S9        |
| Figure S5 High-resolution positive-ion ESI mass spectra of (A) P2 and (B) P4 extracted in<br>AN/W (vol/vol = 4/1), AN/D <sub>2</sub> O (vol/vol = 4/1) and AN/H <sub>2</sub> <sup>18</sup> O (vol/vol = 4/1)<br>solutions.....     | S10       |

## Schemes

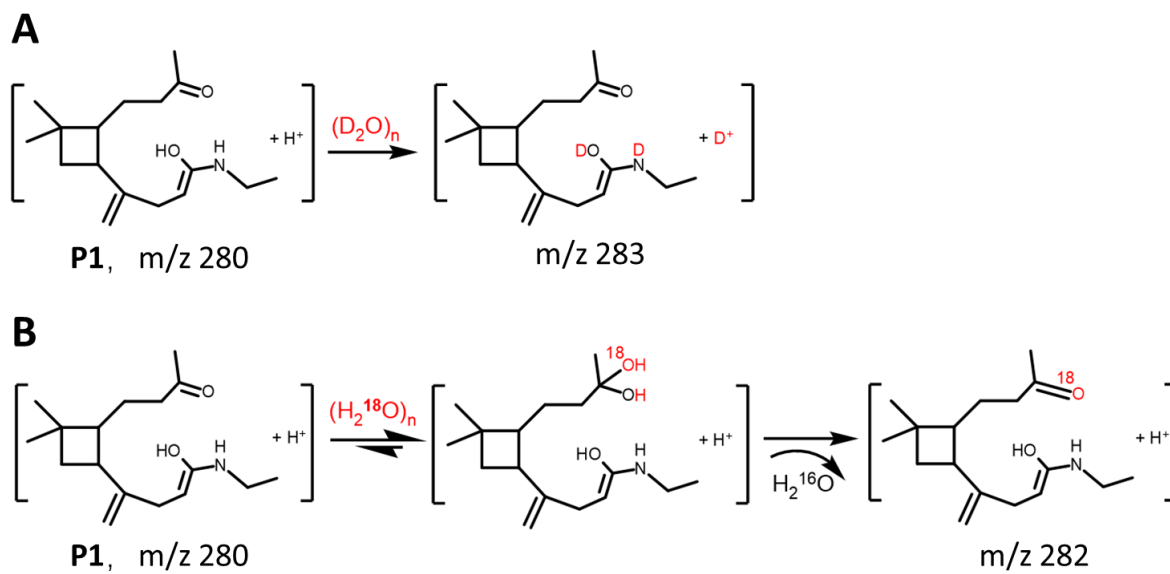

**Scheme S1** (A) H-atom and D-atom exchange between P1 and D<sub>2</sub>O in AN/D<sub>2</sub>O solution. (B) O-atom exchange between P1 and H<sub>2</sub><sup>18</sup>O in AN/H<sub>2</sub><sup>18</sup>O solution.

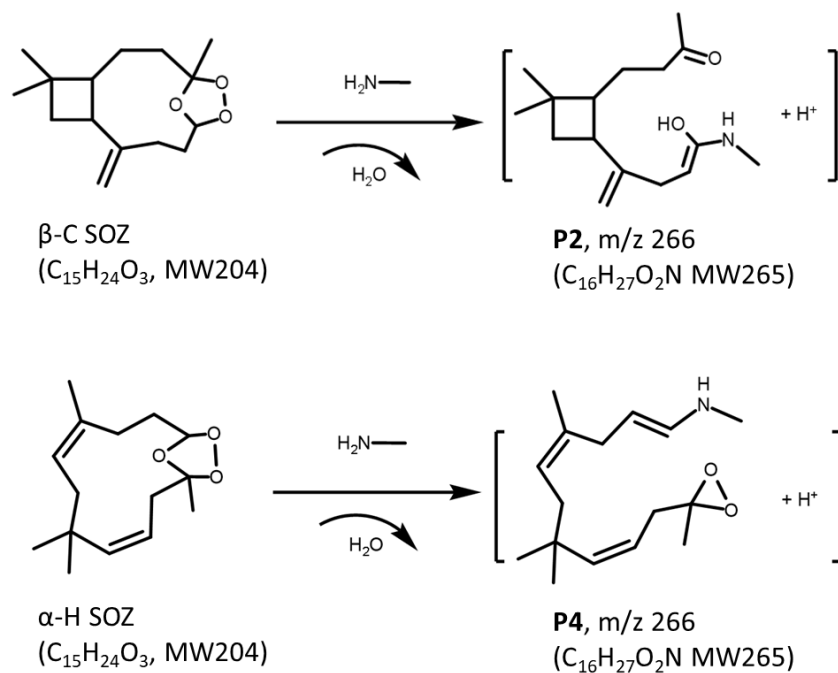

**Scheme S2** Possible structures of P2 and P4 generated from the reactions of  $\beta\text{-C SOZ}$  and  $\alpha\text{-H SOZ}$  with MA

## Figures

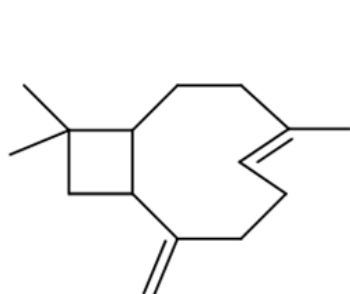

**$\beta$ -caryophyllene**  
**(C<sub>15</sub>H<sub>24</sub>, MW204)**

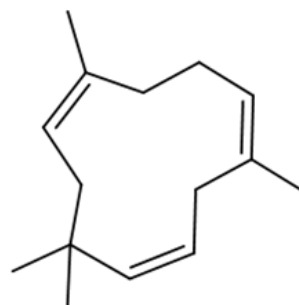

**$\alpha$ -humulene**  
**(C<sub>15</sub>H<sub>24</sub>, MW204)**

**Figure S1** Chemical structures of  $\beta$ -caryophyllene and  $\alpha$ -humulene

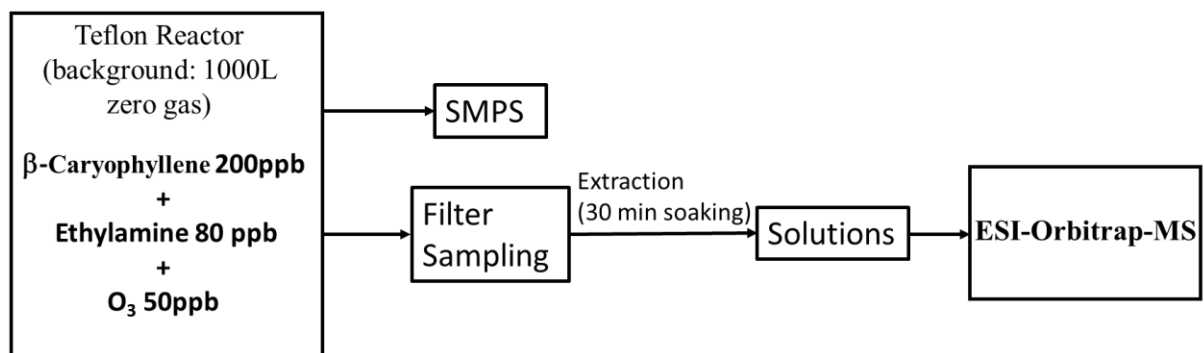

**Figure S2** Schematic setup and procedure used in this work

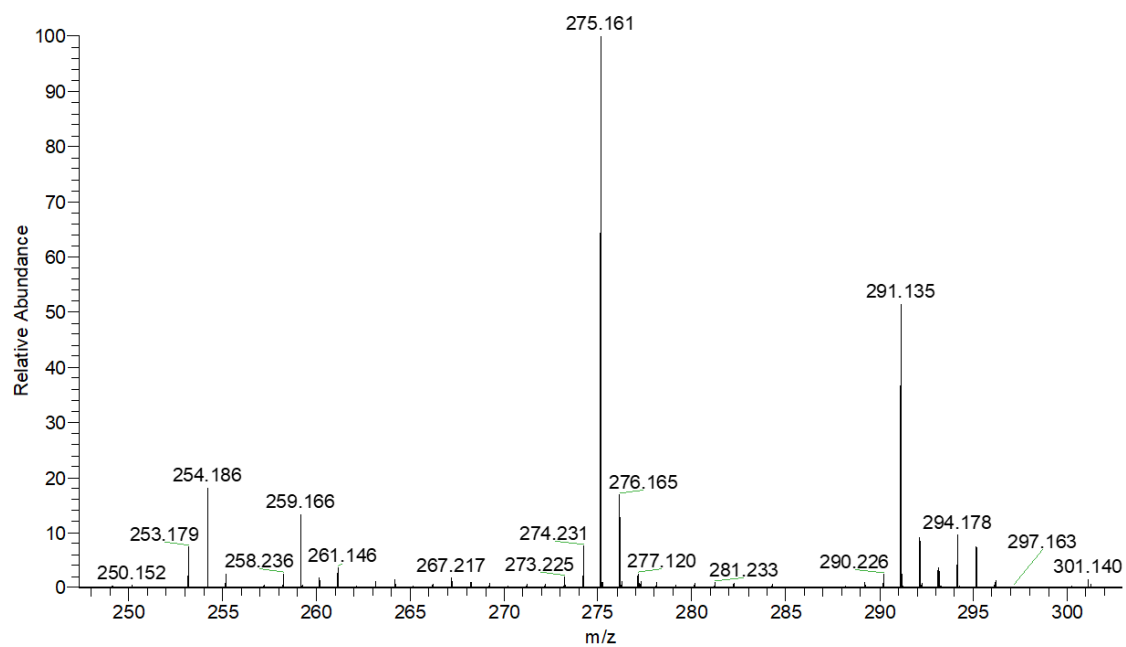

**Figure S3** High-resolution positive-ion ESI mass spectra of the degradation products extracted in AN/D<sub>2</sub>O (vol/vol = 4/1) from  $\beta$ -C reacting with O<sub>3</sub>.



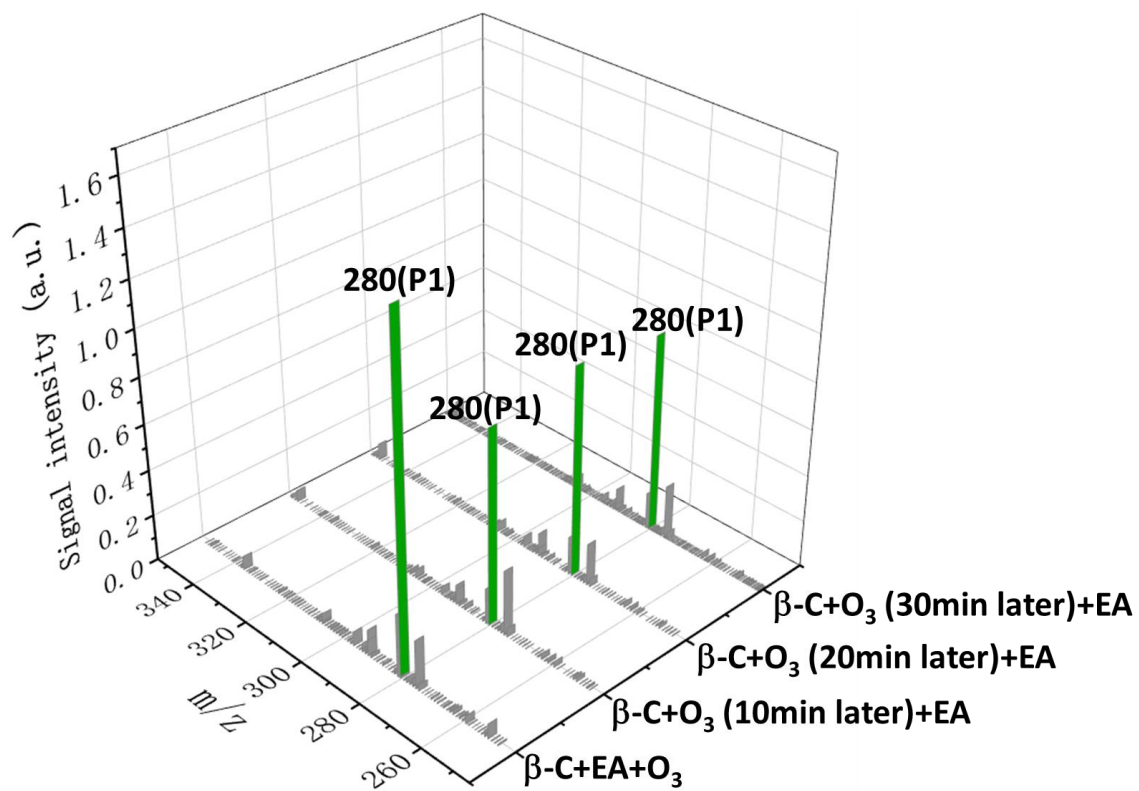

**Figure S4** Positive-ion ESI mass spectra of the products extracted in AN/W (vol/vol = 4/1) from ozonolysis of  $\beta$ -C in addition of EA at different timings

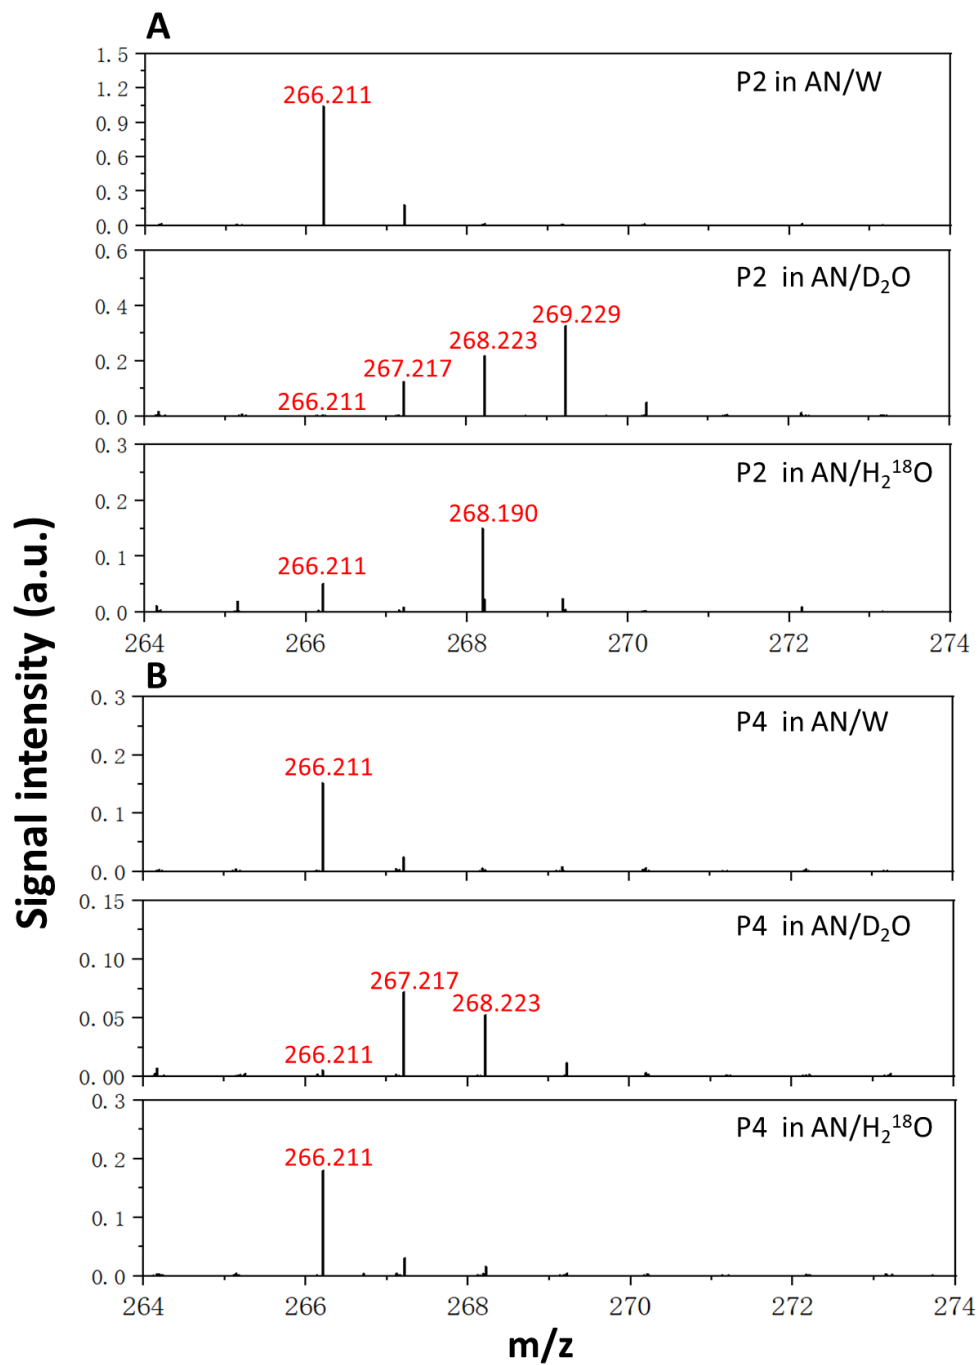

**Figure S5** High-resolution positive-ion ESI mass spectra of (A) P2 and (B) P4 extracted in AN/W (vol/vol = 4/1), AN/D<sub>2</sub>O (vol/vol = 4/1) and AN/H<sub>2</sub><sup>18</sup>O (vol/vol = 4/1) solutions
